# Supplementary material
Source: Research Square preprint supplement (doi:10.21203/rs.3.rs-10165099/v1)
Supplement: Supplementary file 1 [file ced10a268abea1a0d5c03b56.docx]

**Supplementary material for**

**Biofilm induction and tolerance to invasion of marine bacterial communities**

Nan Yang1, Amanda Sofie Seger Jakobsen1, Fábio Pretti1, Mette Burmølle1* and Cristina I. Amador1*

*1 Section of Microbiology, Department of Biology, University of Copenhagen, Copenhagen, Denmark*

* Shared corresponding authors:

Mette Burmølle ([burmolle@bio.ku.dk](mailto:burmolle@bio.ku.dk)); Cristina I. Amador ([chierro@bio.ku.dk](mailto:chierro@bio.ku.dk))

***Contains:***

**7 supplementary figures**

**2 supplementary tables**

**Supplementary Figures**

All biofilm cells stained with SYTO60 (red)

Invader expresses green fluorescence but also stains in red


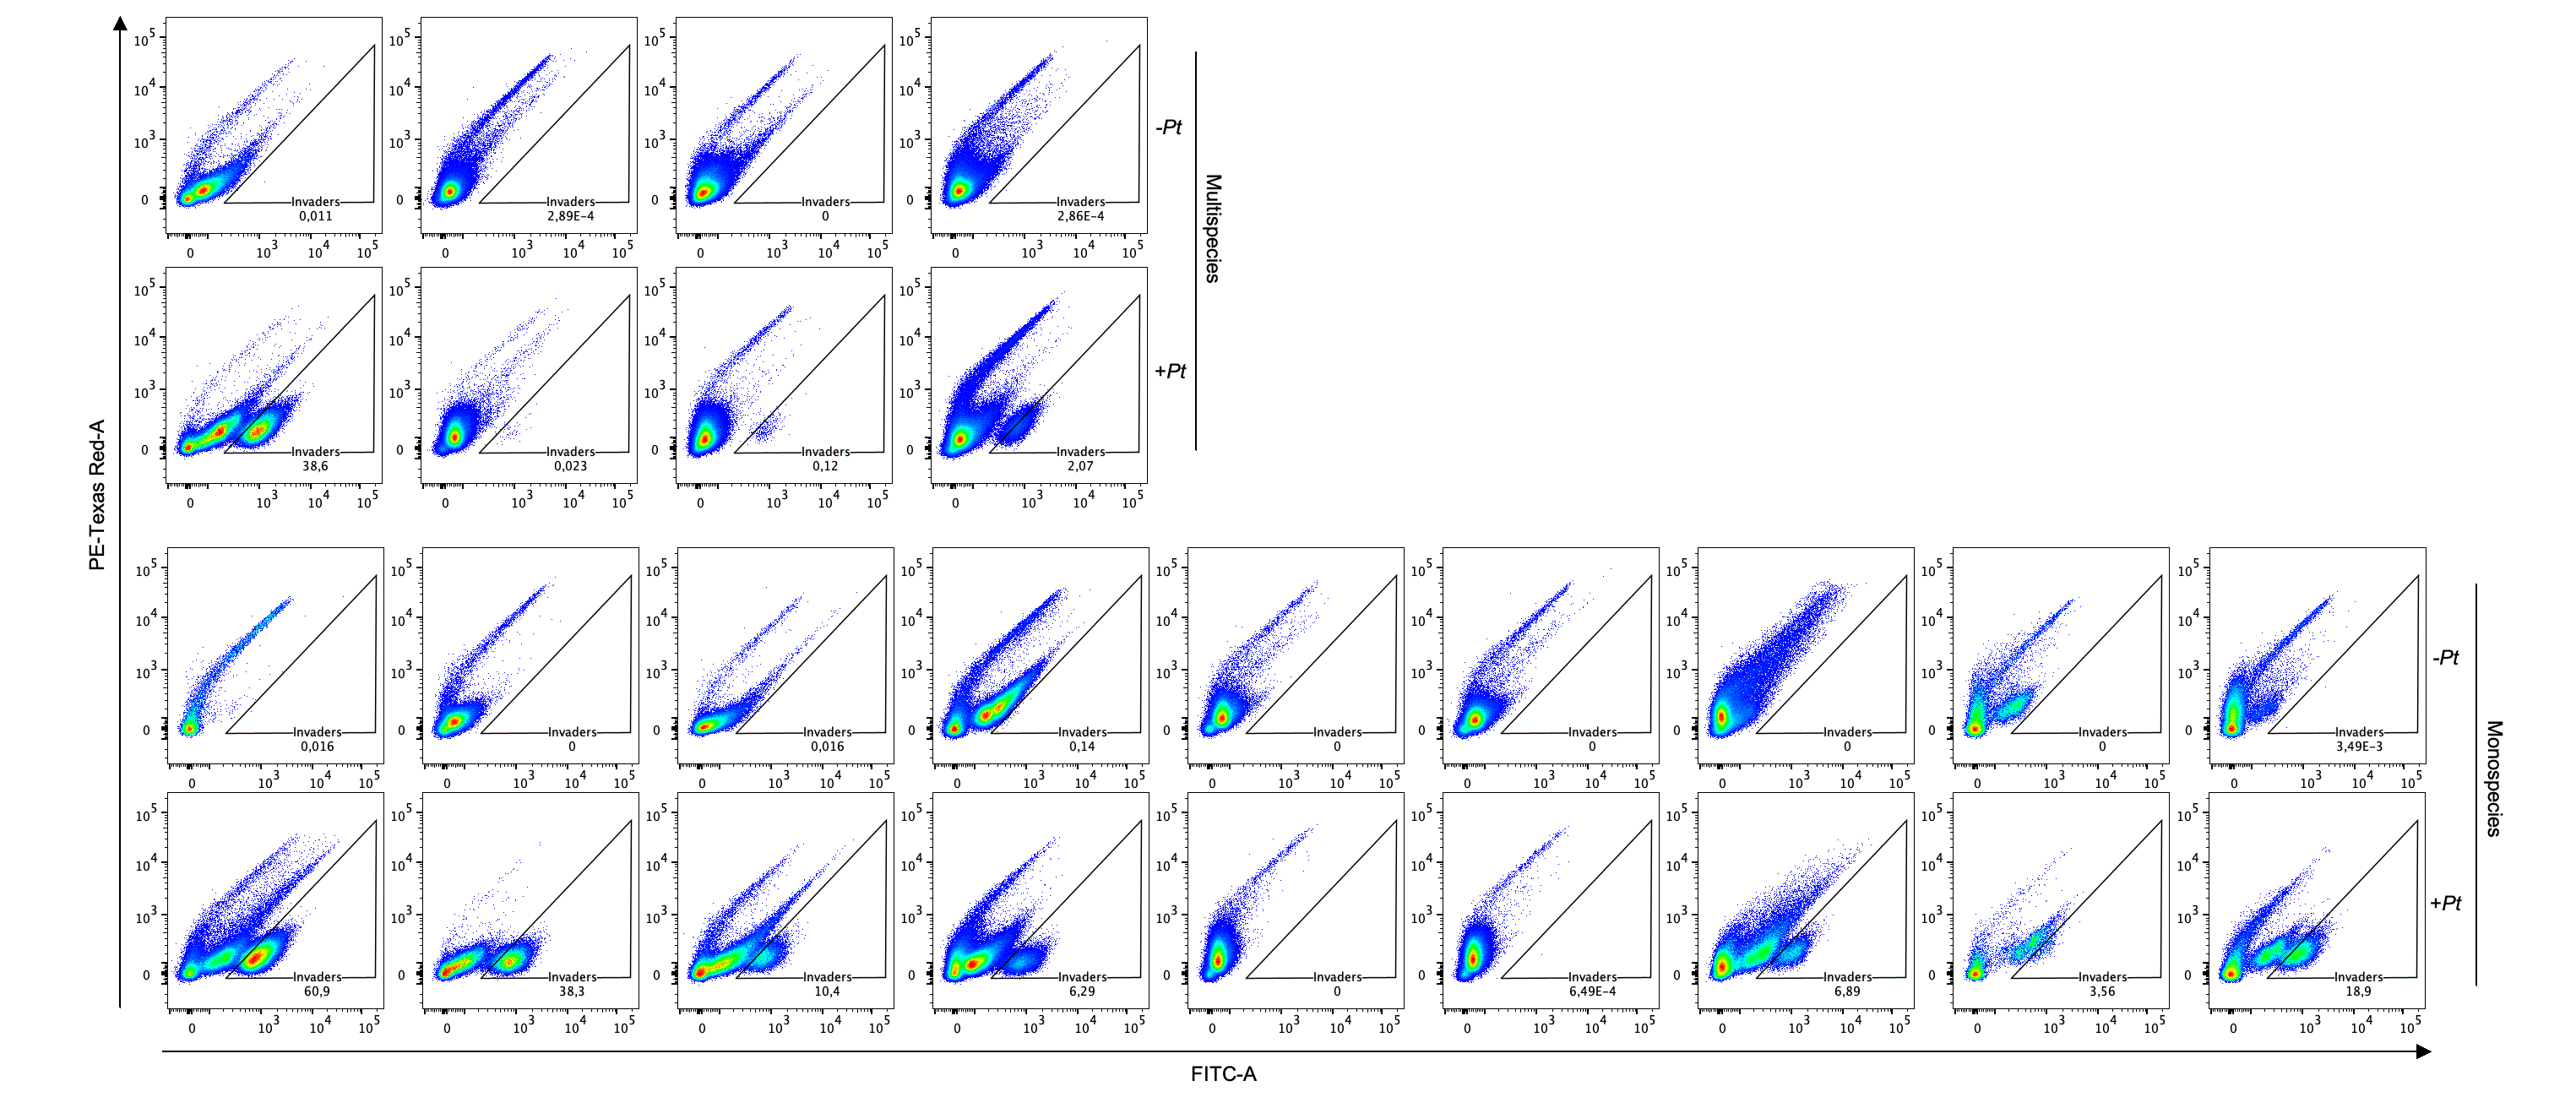


**Gating strategy in flow cytometry**

PE-Texas Red

(**SYTO60**, area)

FITC (**Gfp**, area)


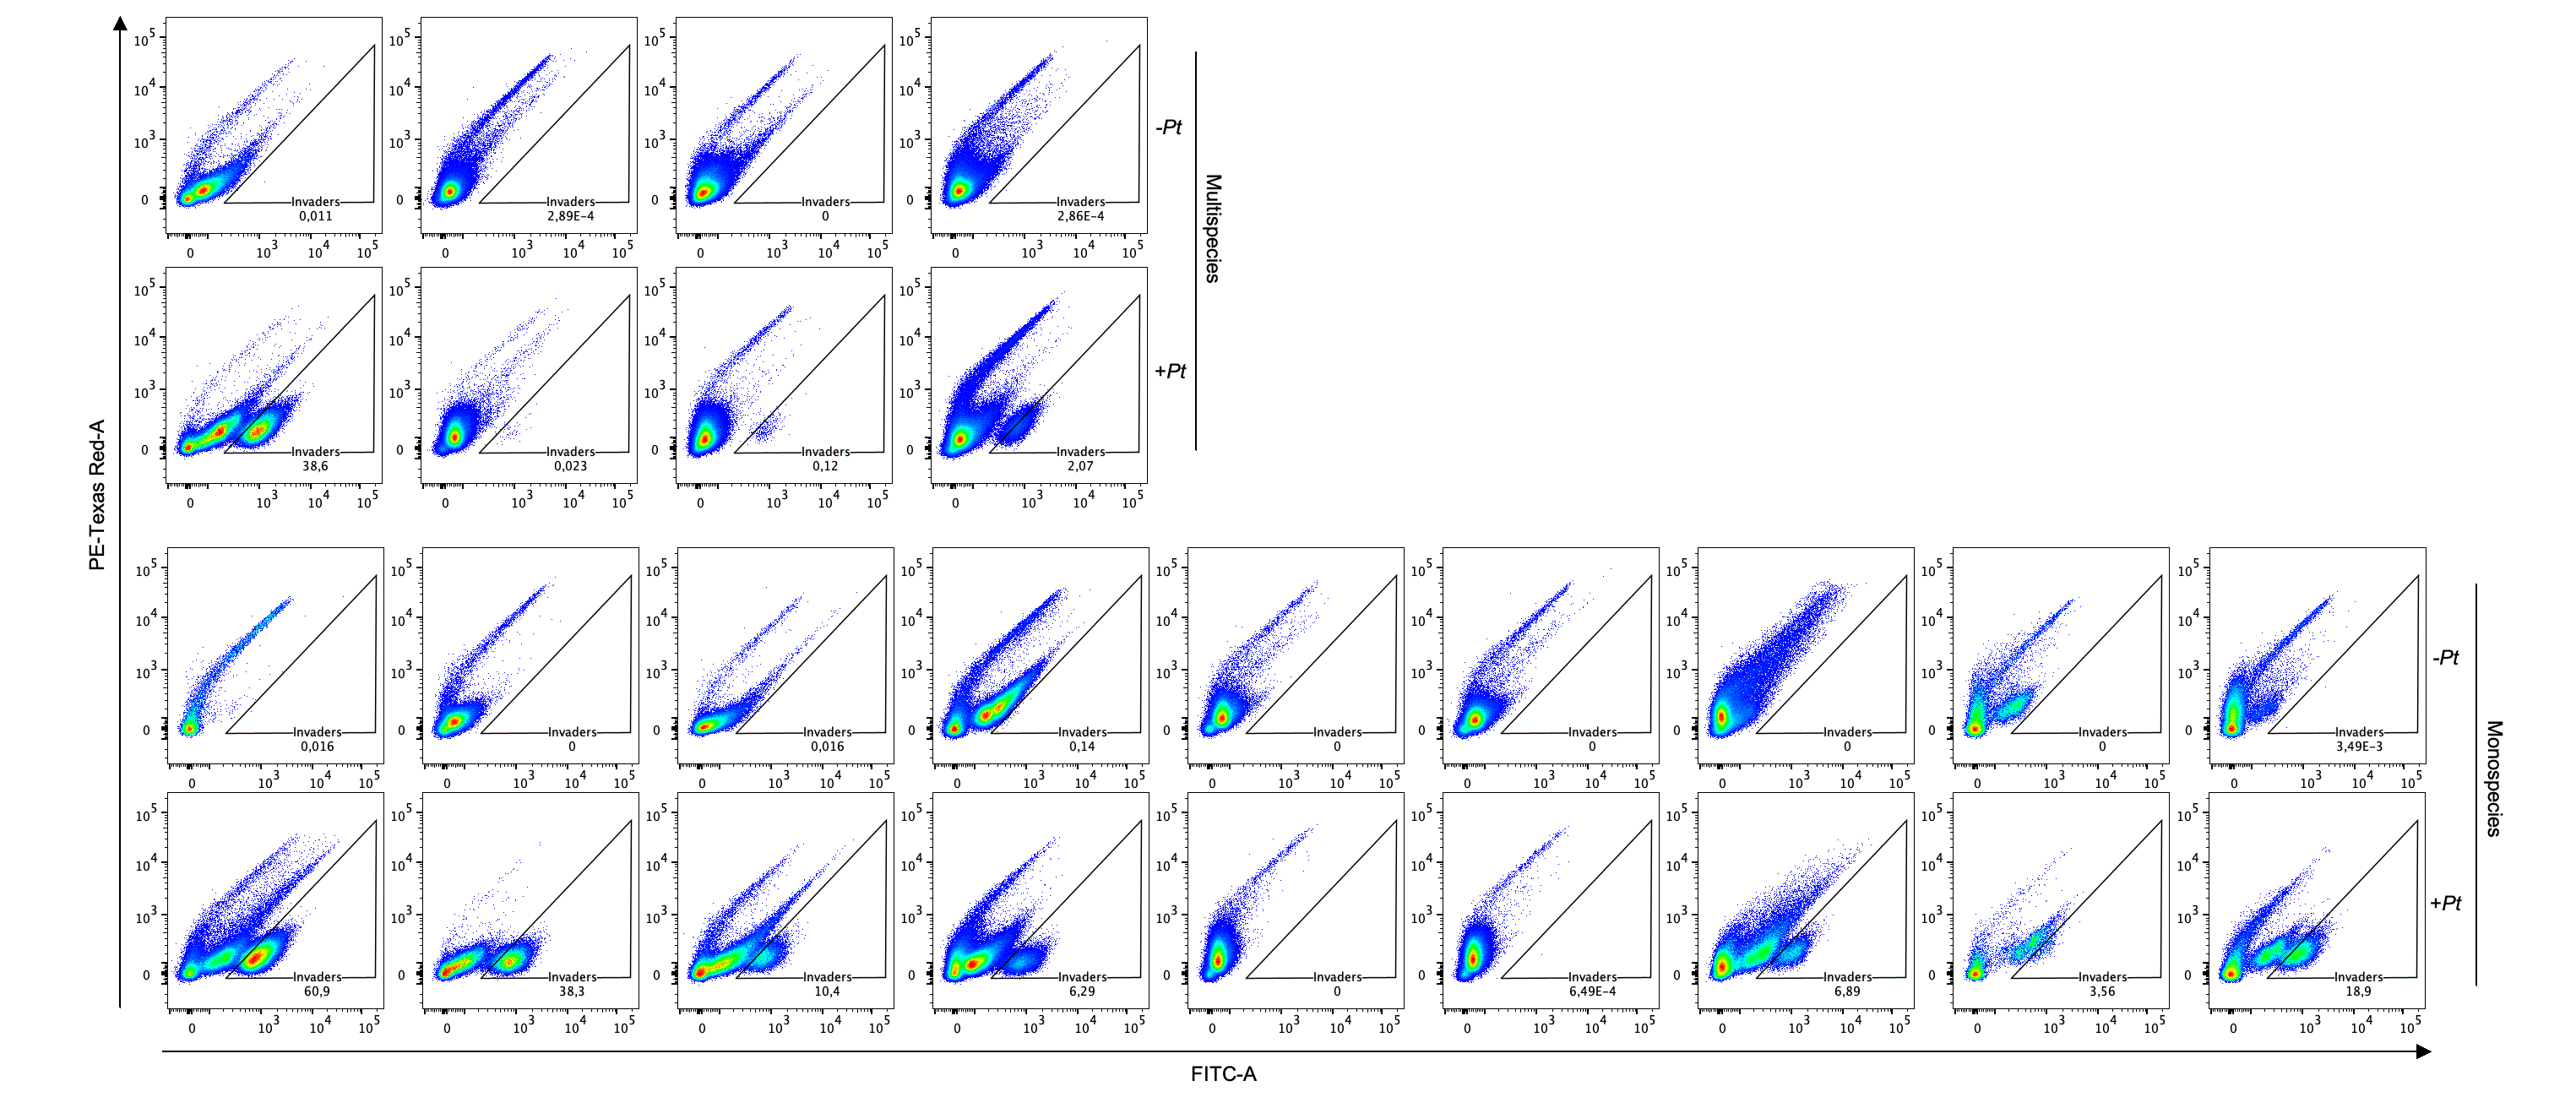


PE-Texas Red

(**SYTO60**, area)

FITC (**Gfp**, area)

**Supplementary Figure 1. Overview of the flow cytometry gating strategy used to identify invader populations** (*P. tunicata*, GFP-tagged). All biofilm-associated cells were stained with SYTO60. Non-invaded biofilms served as controls (left panel; FITC vs. PE–Texas Red–A), establishing the fixed gating region used to detect *P. tunicata* GFP cells in invaded samples (right panel; FITC vs. PE–Texas Red–A).


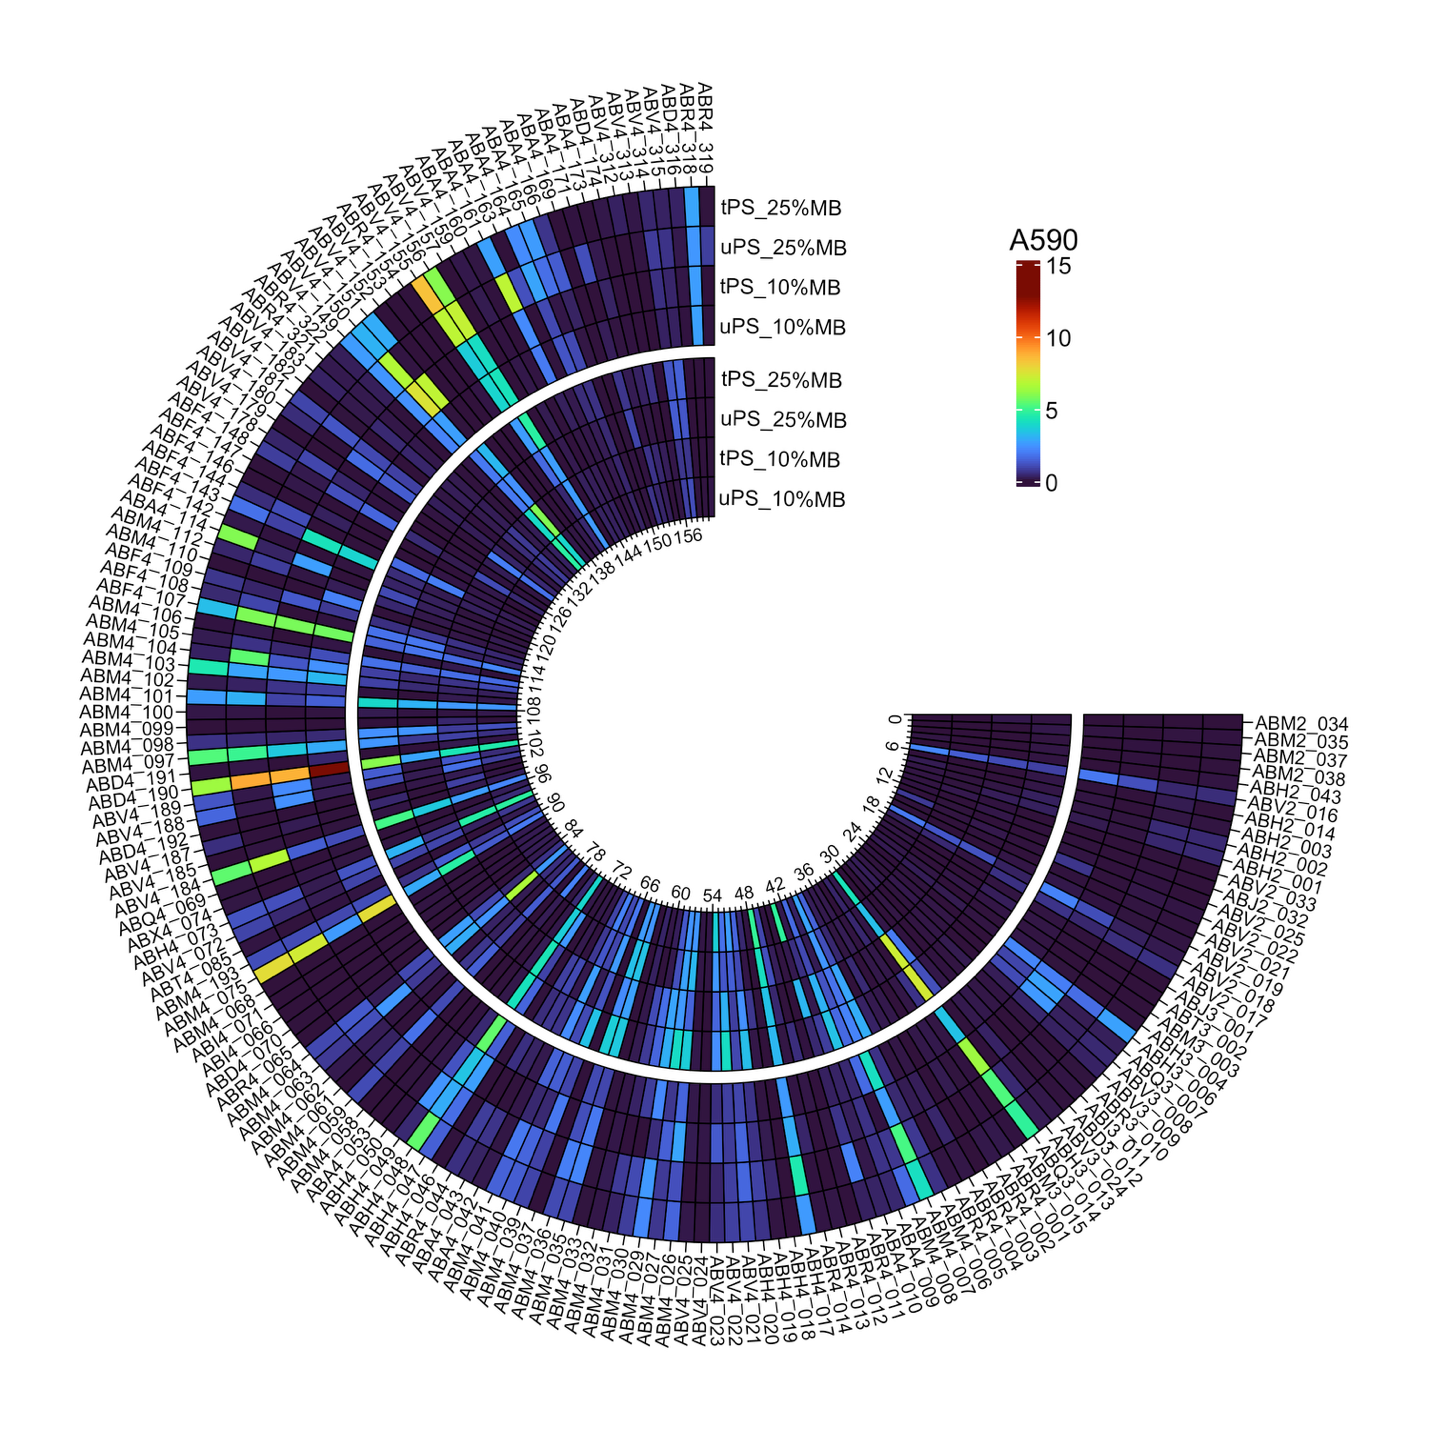


**Supplementary Figure 2.** **Second independent experiment on screening of the 161 marine isolates on different materials, media and incubation times**. The biofilm biomass (A590) of all 161 isolates screened in untreated polystyrene (uPS, hydrophobic) and tissue-culture treated polystyrene (tPS, hydrophilic) microtiter plates, tested in two different marine broth with dilutions of 10% and 25% strength in buffered, supplemented ASW (artificial sea water), and two time points: 24 and 72 hours (n = 3).


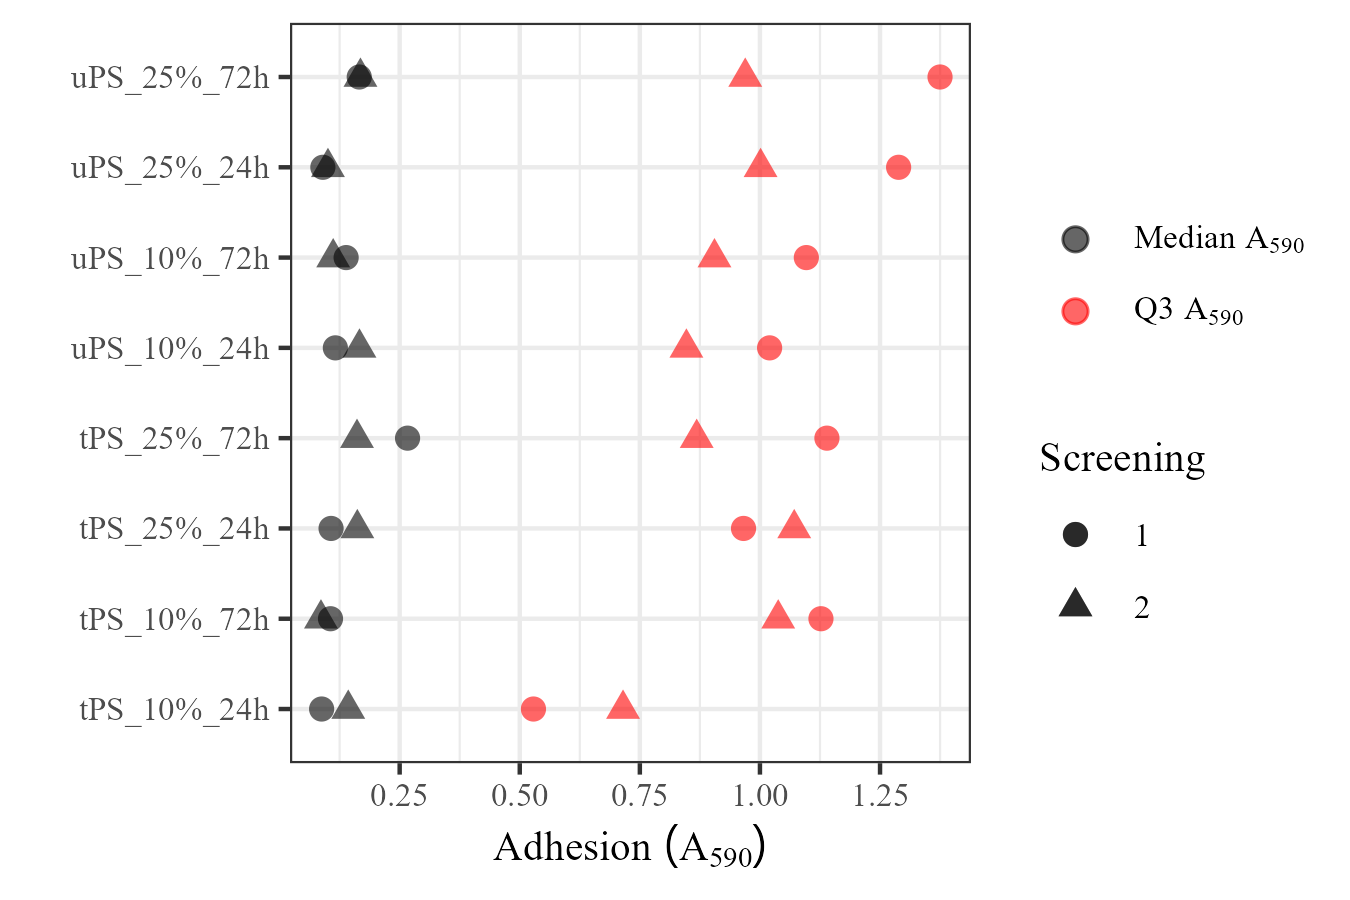


**Supplementary Figure 3. Biofilm biomass (A590) of the marine isolate population (n = 161).** The dot plot compares median and third quartile (Q3) biofilm formation in untreated and treated polystyrene (uPS, tPS, respectively), 10 % or 25 % marine broth (MB) and 72 and 48 h. Median: median biofilm biomass of the population. The third quartile (Q3) biofilm biomass: top 25% biofilm biomass of the population. Point shape represents the media or third quartile for independent screening assays (1 and 2).


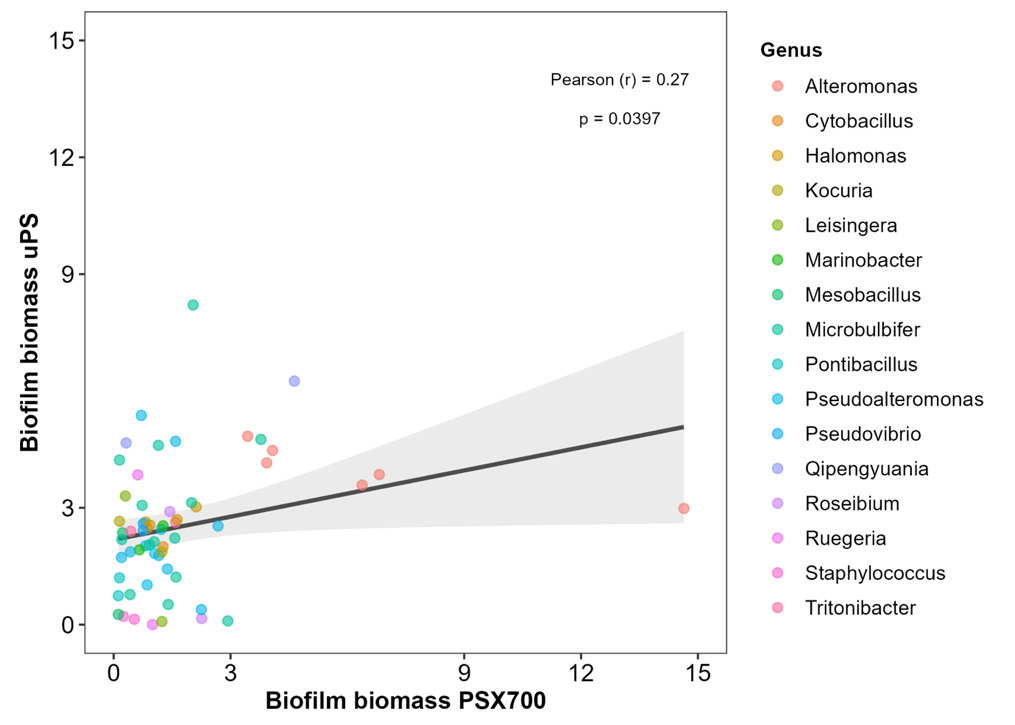


**Supplementary Figure 4. Correlation of biofilm biomass produced by the top 30 isolates on uPS and PSX700-coated surfaces.** Linear regression lines with confidence intervals illustrate correlation of biofilm biomass between uPS and PSX700 materials for top 30 isolates, with Pearson correlation coefficients (r) and *p* value provided in the plot.


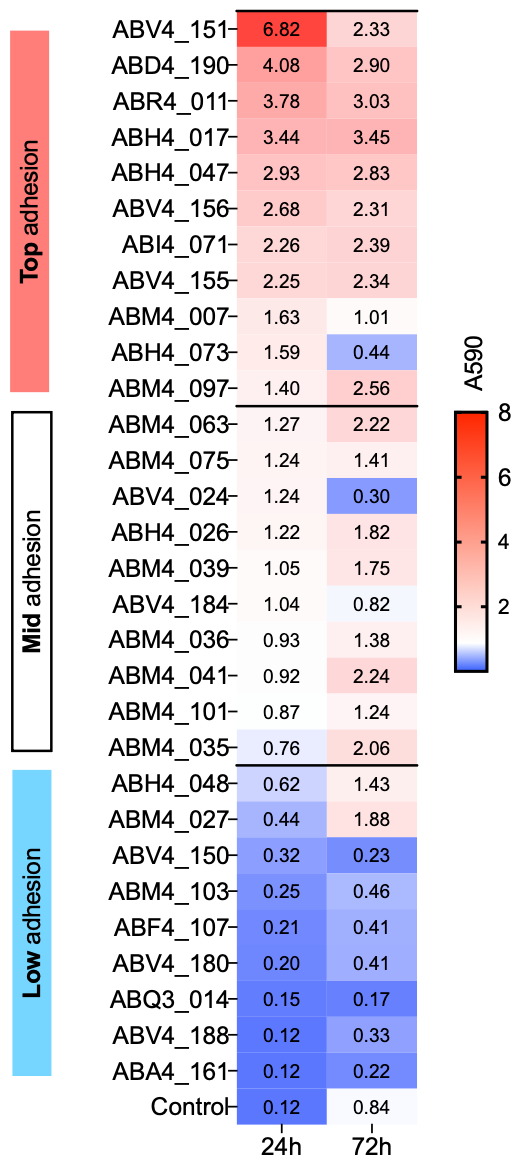


**Supplementary Figure 5.** **Heatmap of biofilm biomass of top 30 biofilm formers on PSX700-coated plates.** Biofilm biomass (A590) was measured at 24 and 72 h (n = 3) in the second independent experiment. These 30 isolates were grouped into three categories (Top, Mid, and Low adhesion), each with 10 isolates. Data from three biological replicates, each with three technical replicates.


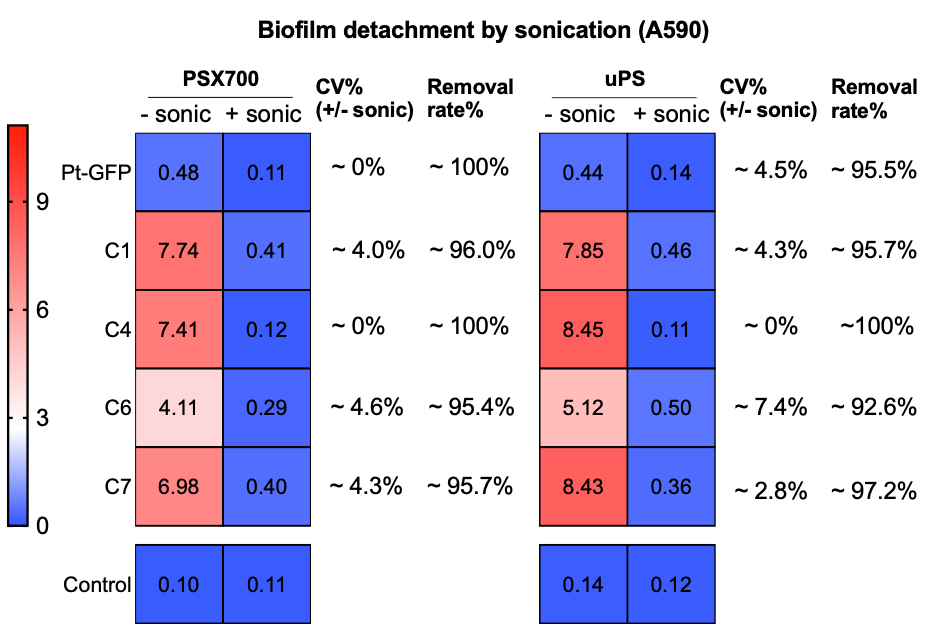


**Supplementary Figure 6. Validation of the sonication protocol for biofilm detachment from uPS and PSX700-coated surfaces.** The heatmap shows biofilm quantification (A₅₉₀) measured by crystal violet (CV) staining before and after sonication. CV% represents the percentage of biofilm remaining after sonication, relative to that before sonication with total detachment indicated as 100 %.


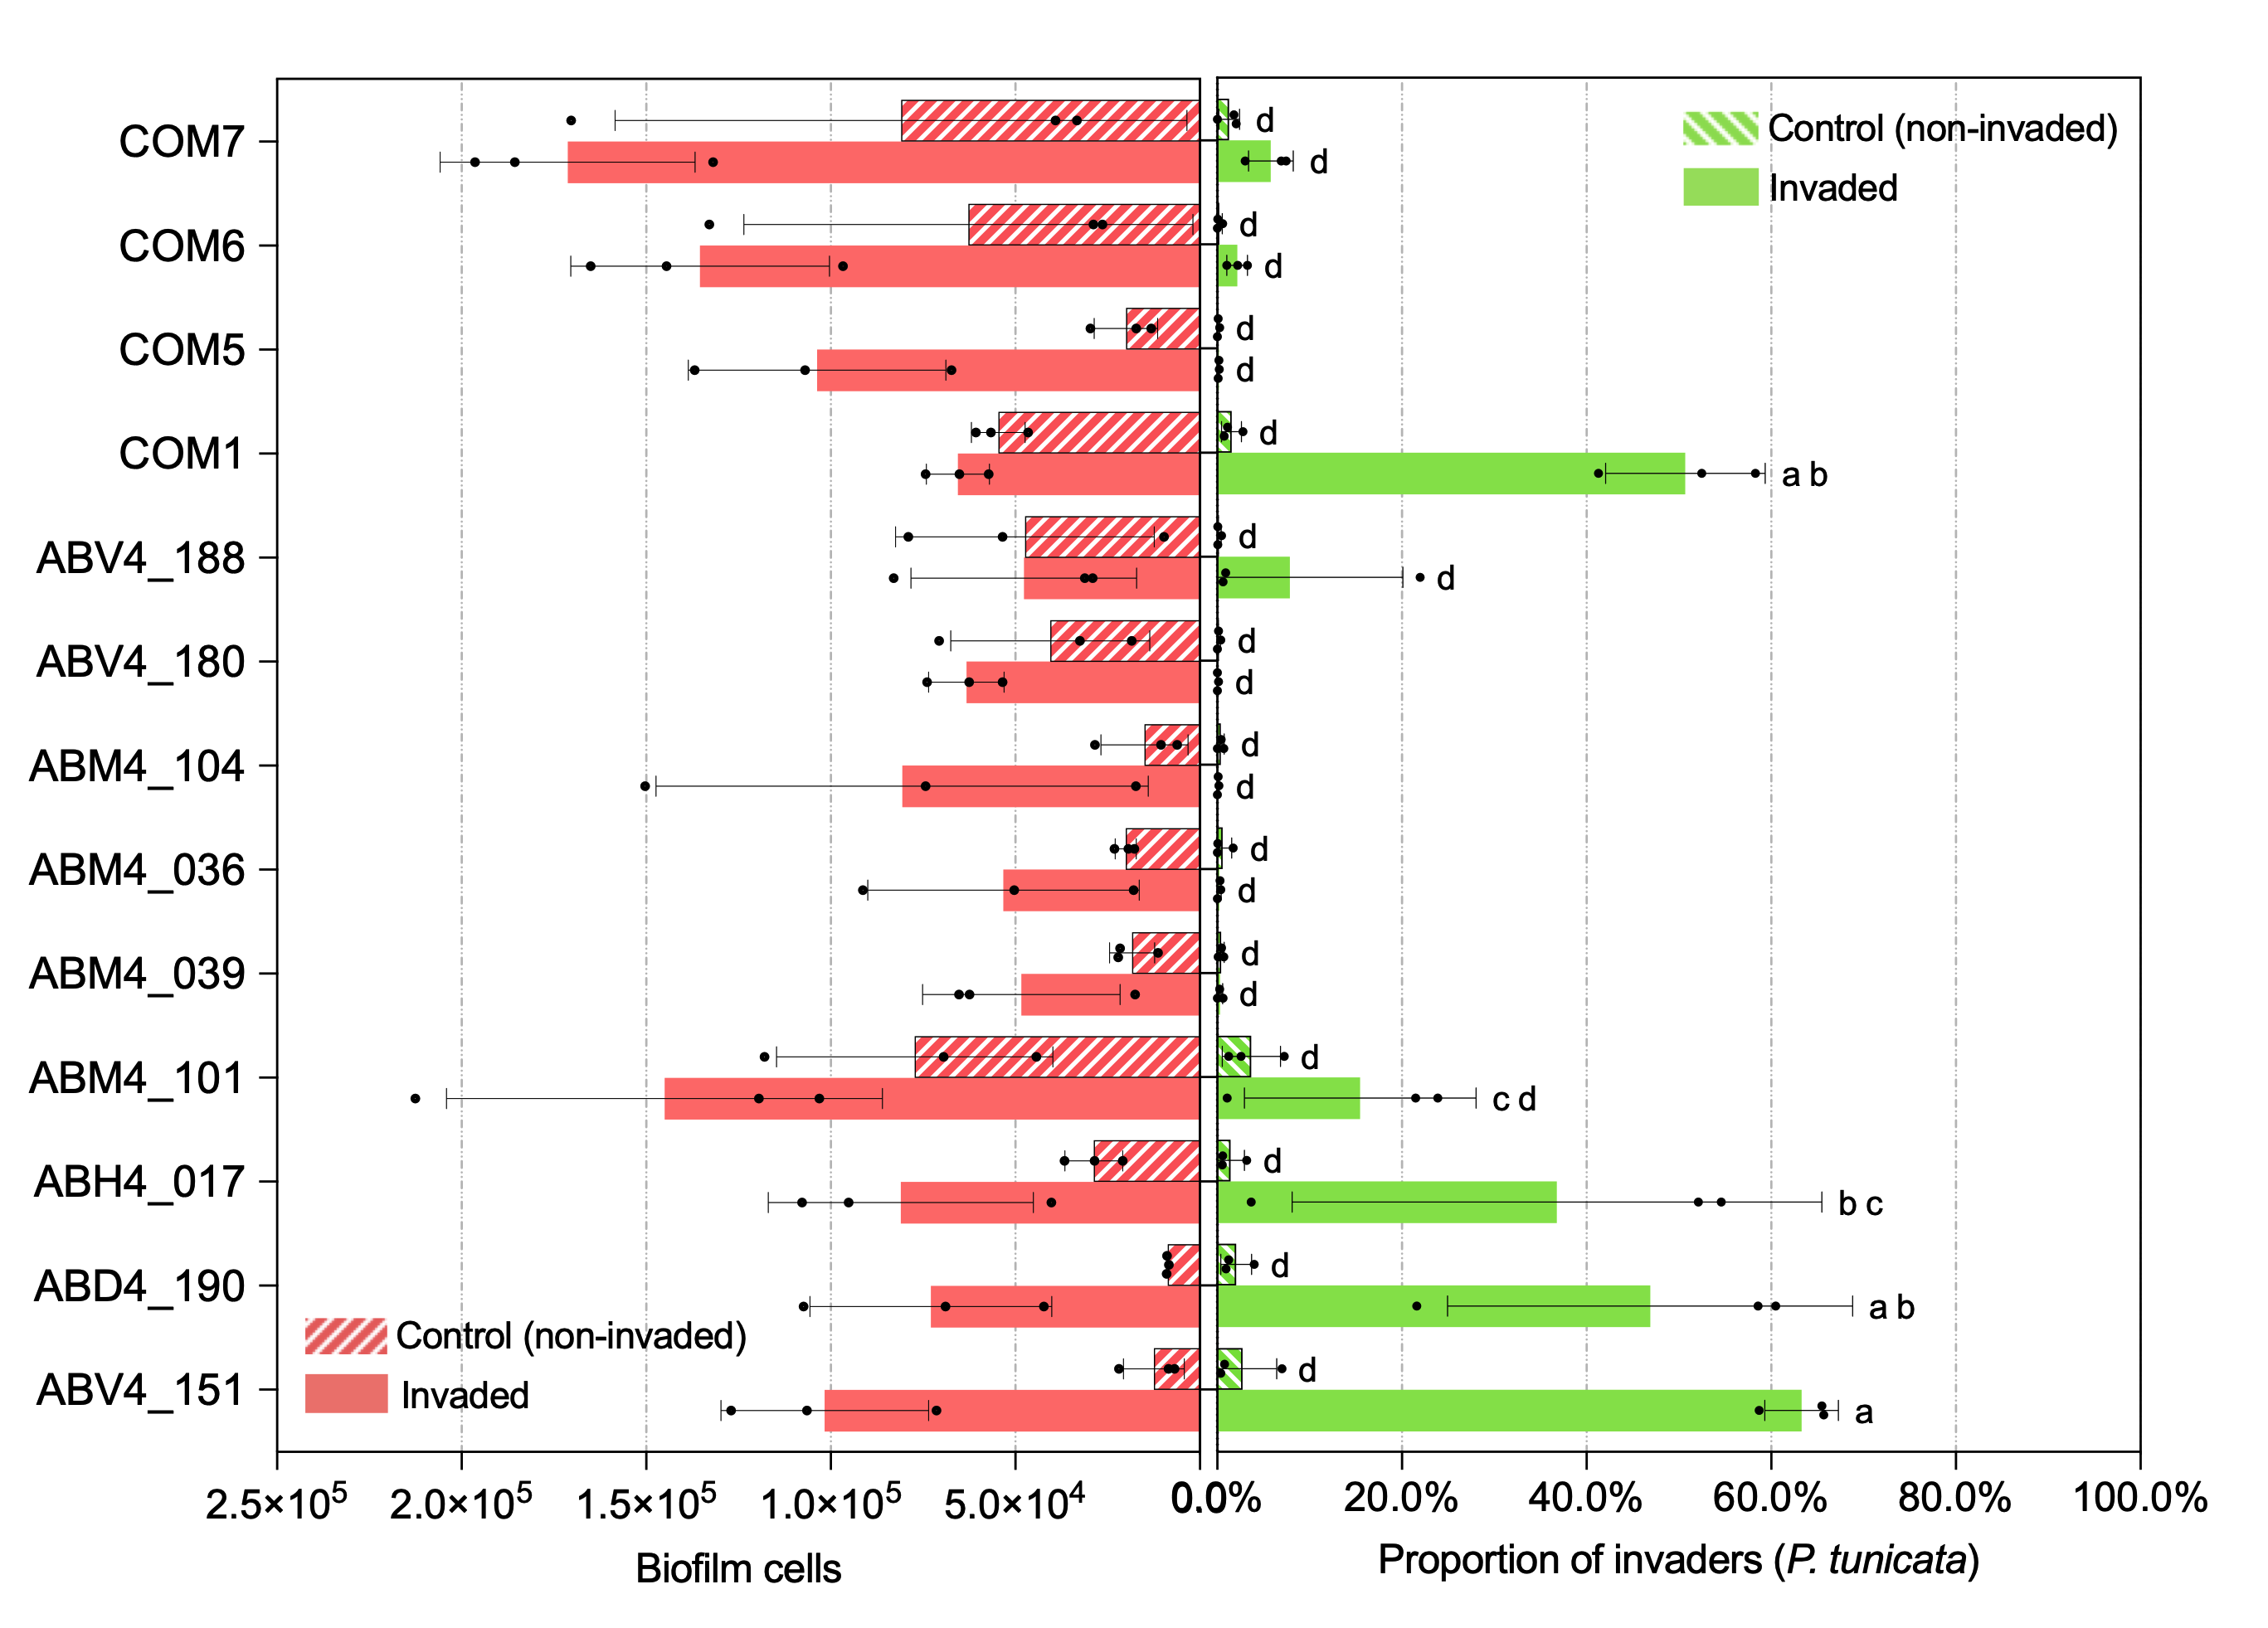


**Supplementary Figure 7.** **Second independent experiment on invasion tolerance of mono- and multispecies biofilms.** Total biofilm cell numbers (left panel) in mono- and multispecies communities with and without *P. tunicata* invasion. Proportion of *P. tunicata* invasion (right panel) in mono- and multispecies communities. Non-invaded non-added *P. tunicata*); Invaded communities (added *P. tunicata*). Error bars represent mean ± standard deviation (n = 3). The different letters above each bar in right panel indicate statistically significant differences determined by two-way ANOVA (Tukey’s studentized range test, *p* < 0.05). Data from three biological replicates, each with three technical replicates

**Supplementary tables**

**Supplementary Table 1**. List of marine isolates used in this study.

| **Strain** | **16S ID** | **WGS accession** | **Reference** |
| --- | --- | --- | --- |
| ABA4_009 | *Halobacillus kuroshimensis* |  | This study |
| ABA4_010 | *Priestia abyssalis* |  | This study |
| ABA4_042 | *Bacillus* sp. |  | This study |
| ABA4_043 | *Bacillus* sp. |  | This study |
| ABA4_053 | *Halobacillus sp.* |  | This study |
| ABA4_114 | *Anaerobacillus sp.* | [JBSWUM000000000](https://www.ncbi.nlm.nih.gov/nuccore/JBSWUM000000000) | This study1 |
| ABA4_160 | *Bacillus* sp. |  | This study |
| ABA4_161 | *Kocuria* sp. |  | This study |
| ABA4_163 | *Bacillus* sp. |  | This study |
| ABA4_164 | *Bacillus* sp. |  | This study |
| ABA4_165 | *Nitratireductor aquimarinus* | [JBSWYD000000000](https://www.ncbi.nlm.nih.gov/nuccore/JBSWYD000000000) | This study1 |
| ABA4_166 | *Bacillus* sp. |  | This study |
| ABA4_169 | *NA* |  | This study |
| ABA4_171 | *Bacillus* sp. |  | This study |
| ABA4_173 | *Dermacoccus* sp. |  | This study |
| ABD3_012 | *Staphylococcus* sp. |  | This study |
| ABD4_070 | *Staphylococcus* sp. |  | This study |
| ABD4_174 | *Muricauda* sp. | [JBSWWP000000000](https://www.ncbi.nlm.nih.gov/nuccore/JBSWWP000000000) | This study1 |
| ABD4_190 | *Alteromonas sp.* | [JBSWWN000000000](https://www.ncbi.nlm.nih.gov/nuccore/JBSWWN000000000) | This study1 |
| ABD4_191 | *Microbulbifer* sp. |  | This study |
| ABD4_192 | *Vibrio alginolyticus* | [JBSWWM000000000](https://www.ncbi.nlm.nih.gov/nuccore/JBSWWM000000000) | This study1 |
| ABD4_316 | *Halobacillus sp.* | [JBSWZA000000000](https://www.ncbi.nlm.nih.gov/nuccore/JBSWZA000000000) | This study1 |
| ABF4_107 | *Microbulbifer sp.* | [JBUBLR000000000](https://www.ncbi.nlm.nih.gov/nuccore/JBUBLR000000000) | This study1 |
| ABF4_108 | *Vibrio* sp. |  | This study |
| ABF4_109 | *Vibrio* sp. |  | This study |
| ABF4_142 | *Pseudoalteromonas* sp. |  | This study |
| ABF4_143 | *Microbulbifer* sp. | [JBSWWT000000000](https://www.ncbi.nlm.nih.gov/nuccore/JBSWWT000000000) | This study1 |
| ABF4_144 | *Ruegeria* sp. | [JBSWWK000000000](https://www.ncbi.nlm.nih.gov/nuccore/JBSWWK000000000) | This study1 |
| ABF4_146 | *Salipiger* sp. | [JBSWYX000000000](https://www.ncbi.nlm.nih.gov/nuccore/JBSWYX000000000) | This study1 |
| ABF4_147 | *Micrococcus luteus* | [JBSWUJ000000000](https://www.ncbi.nlm.nih.gov/nuccore/JBSWUJ000000000) | This study1 |
| ABF4_148 | *Microbulbifer* sp. | [JBSWUI000000000](https://www.ncbi.nlm.nih.gov/nuccore/JBSWUI000000000) | This study1 |
| ABH2_001 | *Vibrio owensii* | [JBSWUH000000000](https://www.ncbi.nlm.nih.gov/nuccore/JBSWUH000000000) | This study1 |
| ABH2_002 | *Vibrio* sp. |  | This study |
| ABH2_003 | *Vibrio* sp. |  | This study |
| ABH2_014 | *Vibrio owensii* | [JBSWWH000000000](https://www.ncbi.nlm.nih.gov/nuccore/JBSWWH000000000) | This study1 |
| ABH2_043 | *Vibrio owensii* | [JBSWWG000000000](https://www.ncbi.nlm.nih.gov/nuccore/JBSWWG000000000) | This study1 |
| ABH3_004 | *Staphylococcus* sp. |  | This study |
| ABH3_006 | *Ruegeria arenilitoris* | [JBSWWE000000000](https://www.ncbi.nlm.nih.gov/nuccore/JBSWWE000000000) | This study1 |
| ABH3_013 | *Microbulbifer* sp. |  | This study |
| ABH4_017 | *Qipengyuania flava* | [JBUBLO000000000](https://www.ncbi.nlm.nih.gov/nuccore/JBUBLO000000000) | This study1 |
| ABH4_018 | *Thalassospira profundimaris* |  | This study |
| ABH4_019 | *Halomonas* sp. | [JBSWWC000000000](https://www.ncbi.nlm.nih.gov/nuccore/JBSWWC000000000) | This study1 |
| ABH4_020 | *Ruegeria arenilitoris* | [JBSWWB000000000](https://www.ncbi.nlm.nih.gov/nuccore/JBSWWB000000000) | This study1 |
| ABH4_046 | *Halobacillus litoralis* | [JBSWUF000000000](https://www.ncbi.nlm.nih.gov/nuccore/JBSWUF000000000) | This study1 |
| ABH4_047 | *Tritonibacter mobilis* | [JBSWWA000000000](https://www.ncbi.nlm.nih.gov/nuccore/JBSWWA000000000) | This study1 |
| ABH4_048 | *Marinobacter xestospongiae* | [JBSWVZ000000000](https://www.ncbi.nlm.nih.gov/nuccore/JBSWVZ000000000) | This study1 |
| ABH4_049 | *Marinobacter* sp. |  | This study |
| ABH4_050 | *Rhodococcus ruber* | [JBSWVY000000000](https://www.ncbi.nlm.nih.gov/nuccore/JBSWVY000000000) | This study1 |
| ABH4_073 | *Cytobacillus kochii* | [JBSWUE000000000](https://www.ncbi.nlm.nih.gov/nuccore/JBSWUE000000000) | This study1 |
| ABI3_011 | *Staphylococcus ureilyticus* |  | This study |
| ABI4_066 | *Dermacoccus* sp. |  | This study |
| ABI4_071 | *Microbulbifer* sp. |  | This study |
| ABJ2_032 | NA |  | This study |
| ABJ3_001 | *Staphylococcus* sp. |  | This study |
| ABM2_034 | NA |  | This study |
| ABM2_035 | *Vibrio* sp. |  | This study |
| ABM2_037 | NA |  | This study |
| ABM2_038 | NA |  | This study |
| ABM3_003 | *Staphylococcus* sp. |  | This study |
| ABM3_015 | *Ruegeria denitrificans* |  | This study |
| ABM4_006 | *Tritonibacter mobilis* |  | This study |
| ABM4_007 | *Microbulbifer variabilis* | [JBSWXF000000000](https://www.ncbi.nlm.nih.gov/nuccore/JBSWXF000000000) | This study1 |
| ABM4_008 | *Microbulbifer* sp. | [JBUBLF000000000](https://www.ncbi.nlm.nih.gov/nuccore/JBUBLF000000000) | This study1 |
| ABM4_026 | *Pseudoalteromonas* sp. |  | This study |
| ABM4_027 | *Pseudoalteromonas* sp. |  | This study |
| ABM4_029 | *Vibrio* sp. |  | This study |
| ABM4_030 | *Vibrio* sp. |  | This study |
| ABM4_031 | *Vibrio owensii* |  | This study |
| ABM4_032 | *Vibrio alginolyticus* |  | This study |
| ABM4_033 | *Vibrio alginolyticus* |  | This study |
| ABM4_035 | *Pseudoalteromonas* sp. |  | This study |
| ABM4_036 | *Pseudoalteromonas ruthenica* | [JBSWUA000000000](https://www.ncbi.nlm.nih.gov/nuccore/JBSWUA000000000) | This study1 |
| ABM4_037 | *Vibrio rotiferianus* |  | This study |
| ABM4_039 | *Pseudoalteromonas ruthenica* | [JBSWTZ000000000](https://www.ncbi.nlm.nih.gov/nuccore/JBSWTZ000000000) | This study1 |
| ABM4_040 | *NA* |  | This study |
| ABM4_041 | *Pseudoalteromonas ruthenica* | [JBSWTY000000000](https://www.ncbi.nlm.nih.gov/nuccore/JBSWTY000000000) | This study1 |
| ABM4_058 | *NA* |  | This study |
| ABM4_059 | *Vibrio owensii* |  | This study |
| ABM4_061 | *NA* |  | This study |
| ABM4_062 | *Microbulbifer* sp. |  | This study |
| ABM4_063 | *Pseudoalteromonas ruthenica* | [JBSWTW000000000](https://www.ncbi.nlm.nih.gov/nuccore/JBSWTW000000000) | This study1 |
| ABM4_064 | *NA* |  | This study |
| ABM4_068 | *Staphylococcus* ureilyticus |  | This study |
| ABM4_075 | *Microbulbifer* sp. |  | This study |
| ABM4_097 | *Pseudovibrio* sp. |  | This study |
| ABM4_098 | *Dermacoccus* sp. |  | This study |
| ABM4_099 | *NA* |  | This study |
| ABM4_100 | *Bacillus* sp. |  | This study |
| ABM4_101 | *Ruegeria* sp. | [JBSWTV000000000](https://www.ncbi.nlm.nih.gov/nuccore/JBSWTV000000000) | This study1 |
| ABM4_102 | *NA* |  | This study |
| ABM4_103 | *Leisingera* sp. | [JBSWTU000000000](https://www.ncbi.nlm.nih.gov/nuccore/JBSWTU000000000) | This study1 |
| ABM4_104 | *Leisingera* sp. |  | This study |
| ABM4_105 | *Pseudoalteromonas* sp. |  | This study |
| ABM4_106 | *Vibrio* sp. |  | This study |
| ABM4_110 | *Staphylococcus* sp. |  | This study |
| ABM4_112 | *NA* |  | This study |
| ABM4_193 | *Ruegeria* sp. | [JBSWTT000000000](https://www.ncbi.nlm.nih.gov/nuccore/JBSWTT000000000) | This study1 |
| ABQ3_007 | *Staphylococcus ureilyticus* |  | This study |
| ABQ3_014 | *Microbulbifer variabilis* |  | This study |
| ABQ4_069 | *Microbulbifer variabilis* |  | This study |
| ABR3_010 | *Staphylococcus ureilyticus* |  | This study |
| ABR4_001 | *Bacillus thuriengensis* | [JBSWTL000000000](https://www.ncbi.nlm.nih.gov/nuccore/JBSWTL000000000) | This study1 |
| ABR4_002 | *Mycoplana* sp. | [JBSWVO000000000](https://www.ncbi.nlm.nih.gov/nuccore/JBSWVO000000000) | This study1 |
| ABR4_003 | *Staphylococcus warneri* | [JBSWVN000000000](https://www.ncbi.nlm.nih.gov/nuccore/JBSWVN000000000) | This study1 |
| ABR4_004 | *Rossellomorea* sp. | [JBSWVM000000000](https://www.ncbi.nlm.nih.gov/nuccore/JBSWVM000000000) | This study1 |
| ABR4_005 | *Bacillus* sp. |  | This study |
| ABR4_011 | *Halomonas litopenaei* | [JBSWVL000000000](https://www.ncbi.nlm.nih.gov/nuccore/JBSWVL000000000) | This study1 |
| ABR4_012 | *Rossellomorea* sp. | [JBSWVK000000000](https://www.ncbi.nlm.nih.gov/nuccore/JBSWVK000000000) | This study1 |
| ABR4_013 | *NA* |  | This study |
| ABR4_014 | *Metabacillus endolithicus* | [JBSVEN000000000](https://www.ncbi.nlm.nih.gov/nuccore/JBSVEN000000000) | This study1 |
| ABR4_044 | *Anaerobacillus* sp. | [JBSWVJ000000000](https://www.ncbi.nlm.nih.gov/nuccore/JBSWVJ000000000) | This study1 |
| ABR4_065 | *Staphylococcus* sp. |  | This study |
| ABR4_154 | *NA* |  | This study |
| ABR4_318 | *Anaerobacillus sp.* | [JBSWVG000000000](https://www.ncbi.nlm.nih.gov/nuccore/JBSWVG000000000) | This study1 |
| ABR4_319 | *Bacillus* sp. |  | This study |
| ABR4_321 | *Anaerobacillus sp.* | [JBSWTK000000000](https://www.ncbi.nlm.nih.gov/nuccore/JBSWTK000000000) | This study1 |
| ABR4_322 | *Alkalihalobacillus* |  | This study |
| ABT3_002 | *Staphylococcus ureilyticus* |  | This study |
| ABT4_085 | *Staphylococcus* sp. |  | This study |
| ABV2_016 | *NA* |  | This study |
| ABV2_017 | *NA* |  | This study |
| ABV2_018 | *NA* |  | This study |
| ABV2_019 | *NA* |  | This study |
| ABV2_021 | *NA* |  | This study |
| ABV2_022 | *NA* |  | This study |
| ABV2_025 | *NA* |  | This study |
| ABV2_033 | *NA* |  | This study |
| ABV3_008 | *Ruegeria* sp. | [JBSWYP000000000](https://www.ncbi.nlm.nih.gov/nuccore/JBSWYP000000000) | This study1 |
| ABV3_009 | *Ruegeria arenilitoris* |  | This study |
| ABV3_024 | *Ruegeria arenilitoris* |  | This study |
| ABV4_021 | *Pseudoalteromonas* sp. | [JBSWVB000000000](https://www.ncbi.nlm.nih.gov/nuccore/JBSWVB000000000) | This study1 |
| ABV4_022 | *Epibacterium* sp. | [JBSWVA000000000](https://www.ncbi.nlm.nih.gov/nuccore/JBSWVA000000000) | This study1 |
| ABV4_023 | *Staphylococcus warneri* |  | This study |
| ABV4_024 | *Staphylococcus warneri* |  | This study |
| ABV4_025 | *Staphylococcus pasteuri* |  | This study |
| ABV4_072 | *Ruegeria denitrificans* |  | This study |
| ABV4_149 | *Staphylococcus pasteuri* | [JBSWXA000000000](https://www.ncbi.nlm.nih.gov/nuccore/JBSWXA000000000) | This study1 |
| ABV4_150 | *Alteromonas sp.* | [JBUBLE000000000](https://www.ncbi.nlm.nih.gov/nuccore/JBUBLE000000000) | This study1 |
| ABV4_151 | *Alteromonas macleodii* | [JBSWUZ000000000](https://www.ncbi.nlm.nih.gov/nuccore/JBSWUZ000000000) | This study1 |
| ABV4_152 | *Salinivibrio* sp. |  | This study |
| ABV4_153 | *Bacillus* sp. |  | This study |
| ABV4_155 | *Microbulbifer* sp. |  | This study |
| ABV4_156 | *Microbulbifer variabilis* | [JBUBLM000000000](https://www.ncbi.nlm.nih.gov/nuccore/JBUBLM000000000) | This study1 |
| ABV4_157 | *Microbulbifer* sp. |  | This study |
| ABV4_159 | *Bacillus thuringiensis* | [JBSWYO000000000](https://www.ncbi.nlm.nih.gov/nuccore/JBSWYO000000000) | This study1 |
| ABV4_178 | *Microbacterium testaceum* | [JBUBLL000000000](https://www.ncbi.nlm.nih.gov/nuccore/JBUBLL000000000) | This study1 |
| ABV4_179 | *Brevundimonas* sp. | [JBUBLK000000000](https://www.ncbi.nlm.nih.gov/nuccore/JBUBLK000000000) | This study1 |
| ABV4_180 | *Mesobacillus* sp. | [JBSWTJ000000000](https://www.ncbi.nlm.nih.gov/nuccore/JBSWTJ000000000) | This study1 |
| ABV4_181 | *Ruegeria* sp. | [JBSWTI000000000](https://www.ncbi.nlm.nih.gov/nuccore/JBSWTI000000000) | This study1 |
| ABV4_182 | *Pseudomonas luteola* | [JBSWUY000000000](https://www.ncbi.nlm.nih.gov/nuccore/JBSWUY000000000) | This study1 |
| ABV4_183 | *Mesobacillus* sp. | [JBSWUX000000000](https://www.ncbi.nlm.nih.gov/nuccore/JBSWUX000000000) | This study1 |
| ABV4_184 | *Roseibium* sp. |  | This study |
| ABV4_185 | *Saccharospirillum* sp. | [JBSWUW000000000](https://www.ncbi.nlm.nih.gov/nuccore/JBSWUW000000000) | This study1 |
| ABV4_187 | *NA* |  | This study |
| ABV4_188 | *Pontibacillus* sp. | [JBUBLJ000000000](https://www.ncbi.nlm.nih.gov/nuccore/JBUBLJ000000000) | This study1 |
| ABV4_189 | *Brevundimonas* sp. |  | This study |
| ABV4_312 | *Halobacillus sp.* |  | This study |
| ABV4_313 | *Catenococcus* sp. |  | This study |
| ABV4_314 | *Vibrio* sp. |  | This study |
| ABV4_315 | *Vibrio* sp. |  | This study |
| ABX4_074 | *Priestia* sp. | [JBSWYN000000000](https://www.ncbi.nlm.nih.gov/nuccore/JBSWYN000000000) | This study1 |

1 These strains are currently in review process for a genome announcement manuscript.

**Supplementary Table 2**. Strains used for chromosomal tagging of *Pseudoalteromonas tunicata* D2 (*P. tunicata*).

| **Strain** | **Plasmid** | **Features** | **Reference** |
| --- | --- | --- | --- |
| *P. tunicata* |  | Wild-type strain | (1) |
| *P. tunicata-gfp* |  | *P. tunicata* derivative, miniTn7-Plac-GFP-Chl. ChlR, TmpR | This study |
| *Escherichia coli* GeneHogs | pBK-miniTn7-gfp3 | Delivery plasmid AmpR, ChlR | (2) |
| *E. coli DH5α* | pTNS2 | Helper transposase. AmpR | (3) |
| *E. coli S17-1* | pRK2013 | Helper conjugation. KanR | (4) |

**References**

1. Rao D, Webb JS, Kjelleberg S. Competitive interactions in mixed-species biofilms containing the marine bacterium Pseudoalteromonas tunicata. Appl Environ Microbiol. 2005;71(4):1729-36.

2. Koch B, Jensen LE, Nybroe O. A panel of Tn-based vectors for insertion of the marker gene or for delivery of cloned DNA into Gram-negative bacteria at a neutral chromosomal site. J Microbiol Methods. 2001;45(3):187-95.

3. Choi KH, Gaynor JB, White KG, Lopez C, Bosio CM, Karkhoff-Schweizer RR, et al. A Tn7-based broad-range bacterial cloning and expression system. Nat Methods. 2005;2(6):443-8.

4. Figurski DH, Helinski DR. Replication of an Origin-Containing Derivative of Plasmid Rk2 Dependent on a Plasmid Function Provided in Trans. P Natl Acad Sci USA. 1979;76(4):1648-52.
